# Supplementary material for: Feedback control of Wnt signaling based on ultrastable histidine cluster co-aggregation between Naked/NKD and Axin
Source: eLife journal article supplement (doi:10.7554/elife.59879), 2020-10-07
Supplement: supp [file elife_poa_e59879_Supplementary_file_1.pdf › elife_poa_e59879_Supplementary_file_1.pdf]

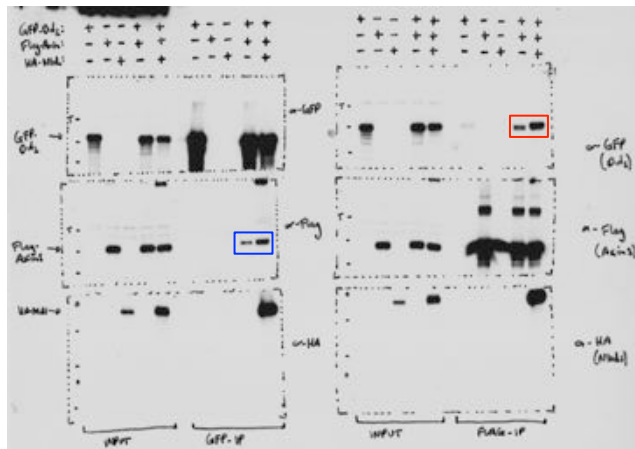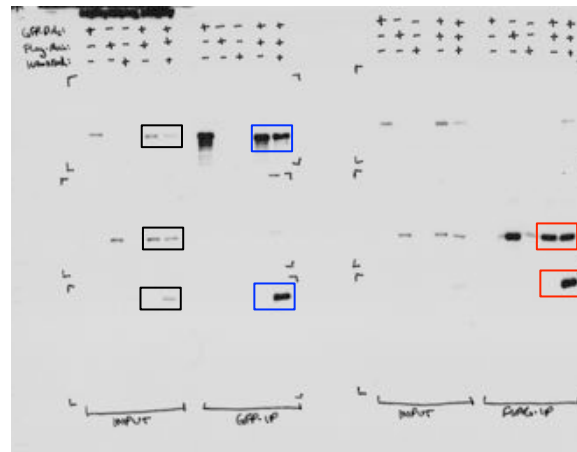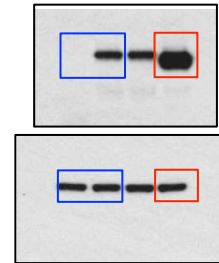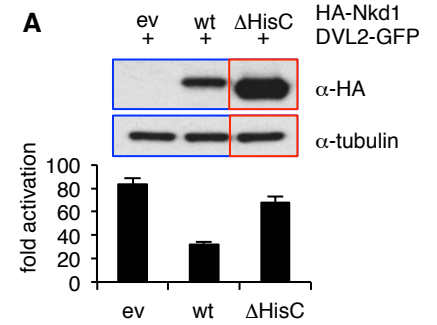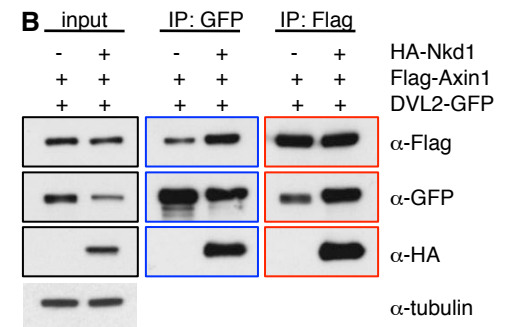

Figure 1 Gammons et al.

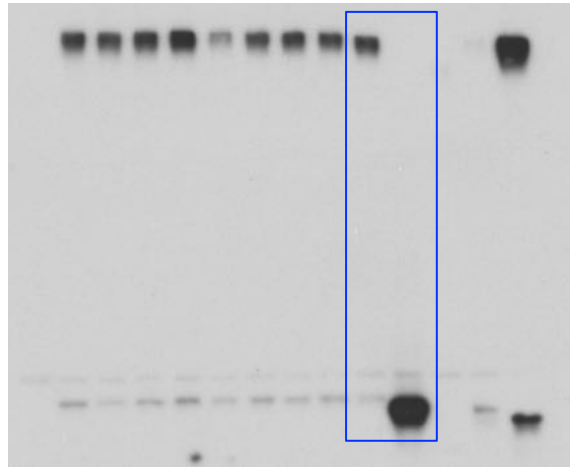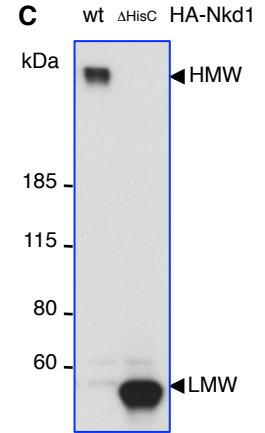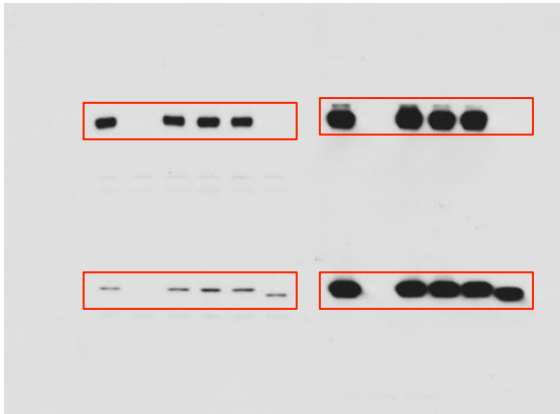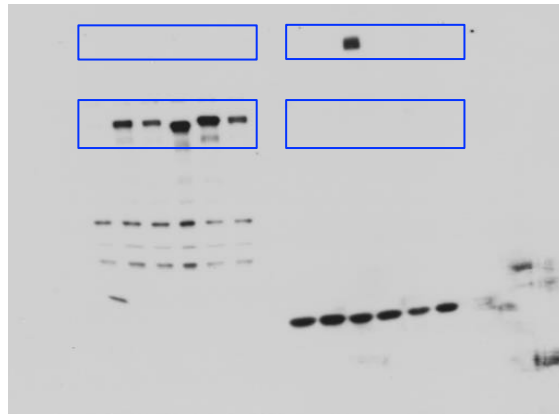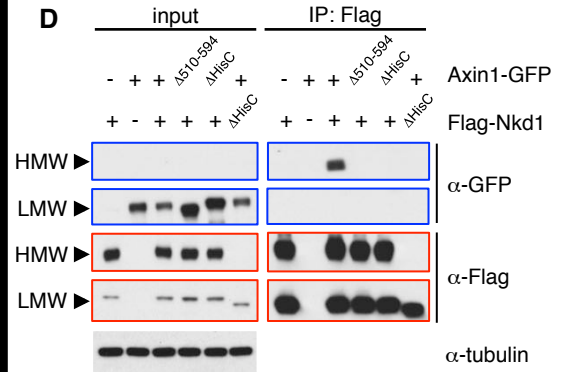

**Figure 1 Gammons et al.**

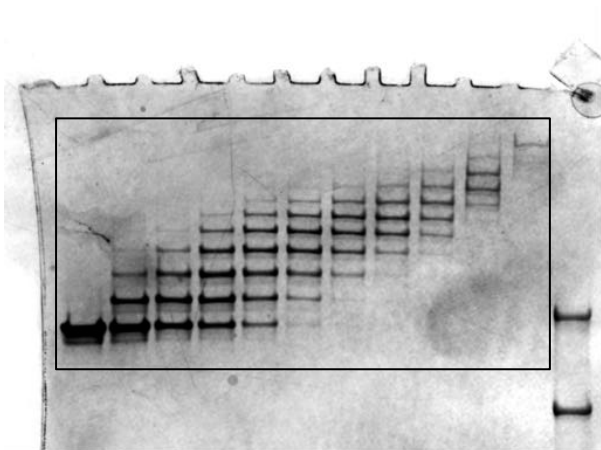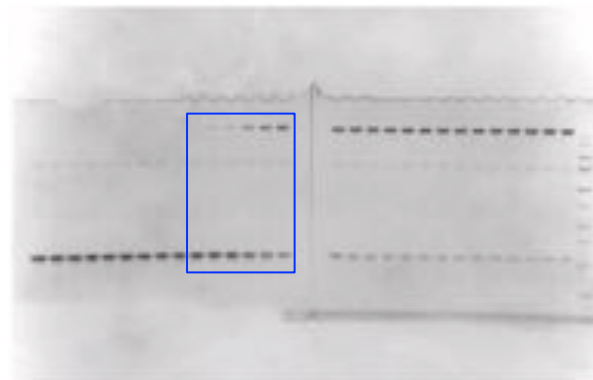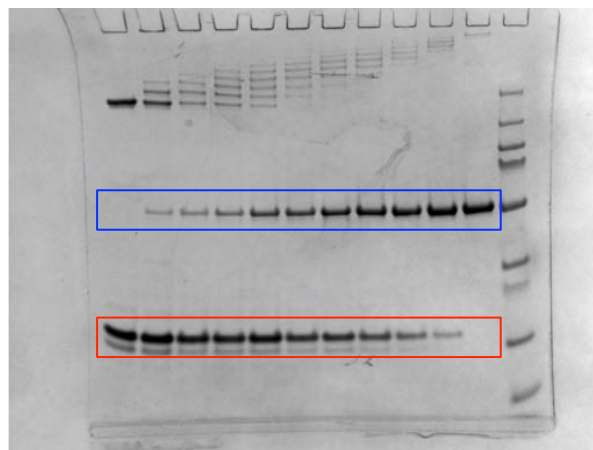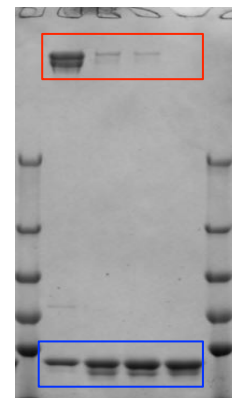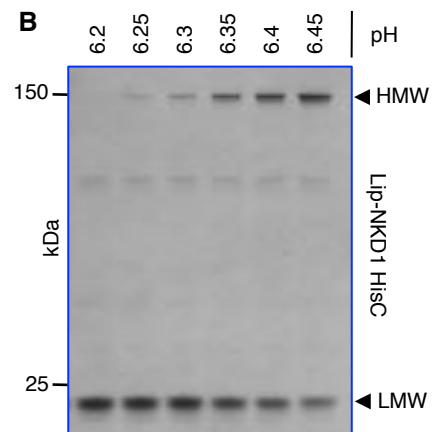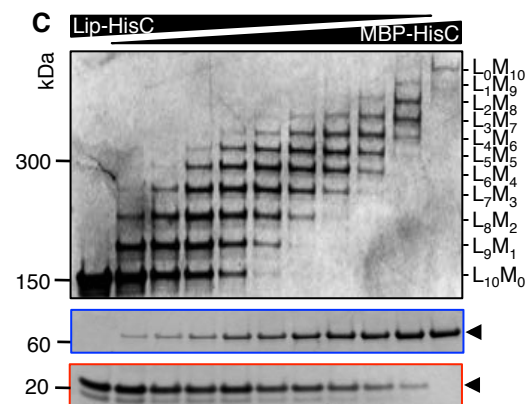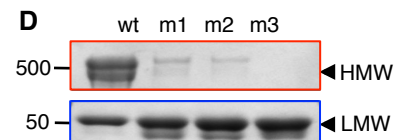

**Figure 2 Gammons et al.**

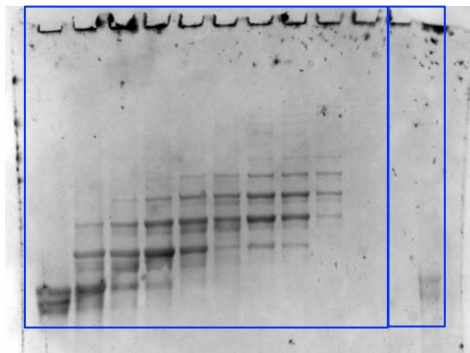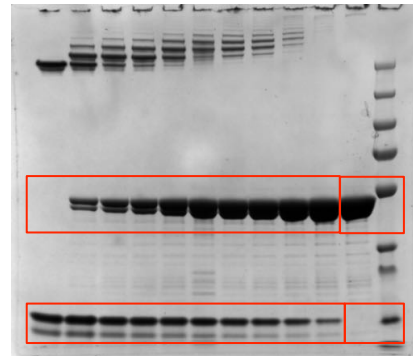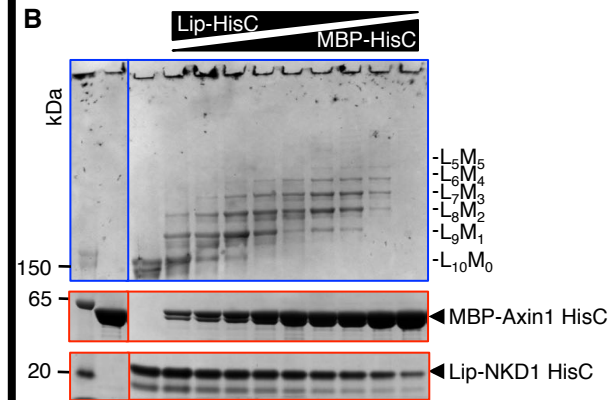

**Figure 3 Gammons et al.**

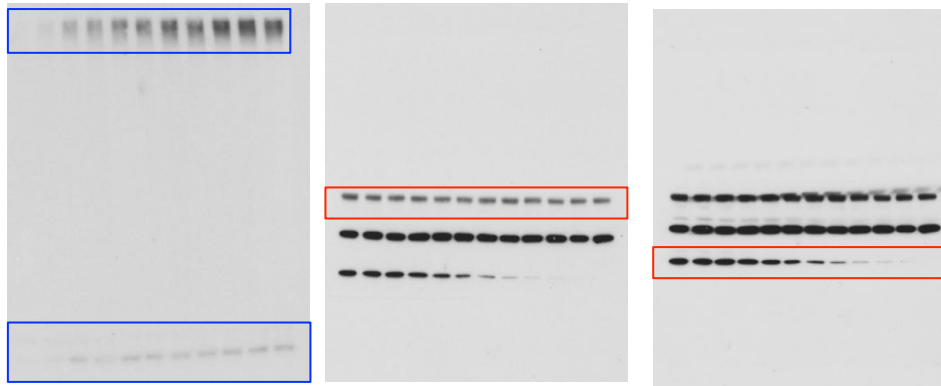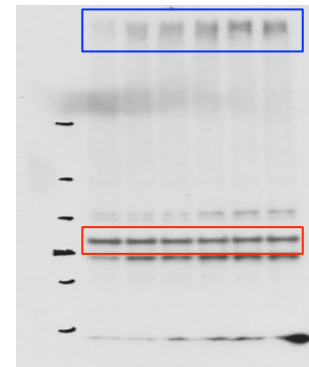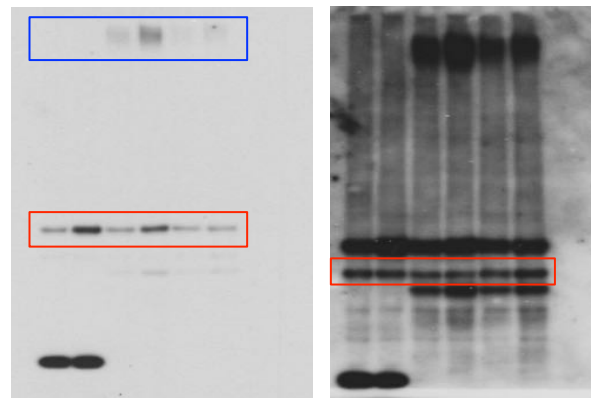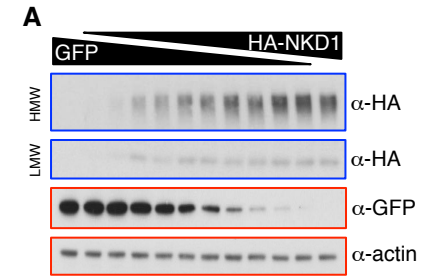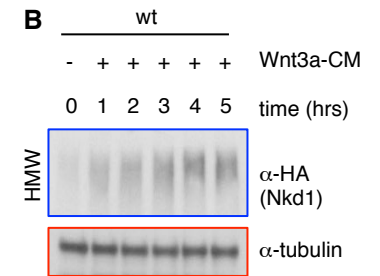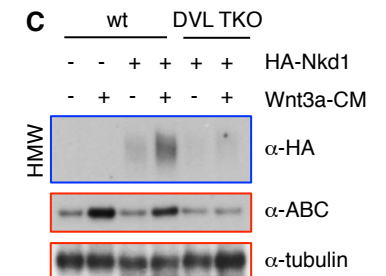

**Figure 4 Gammons et al.**

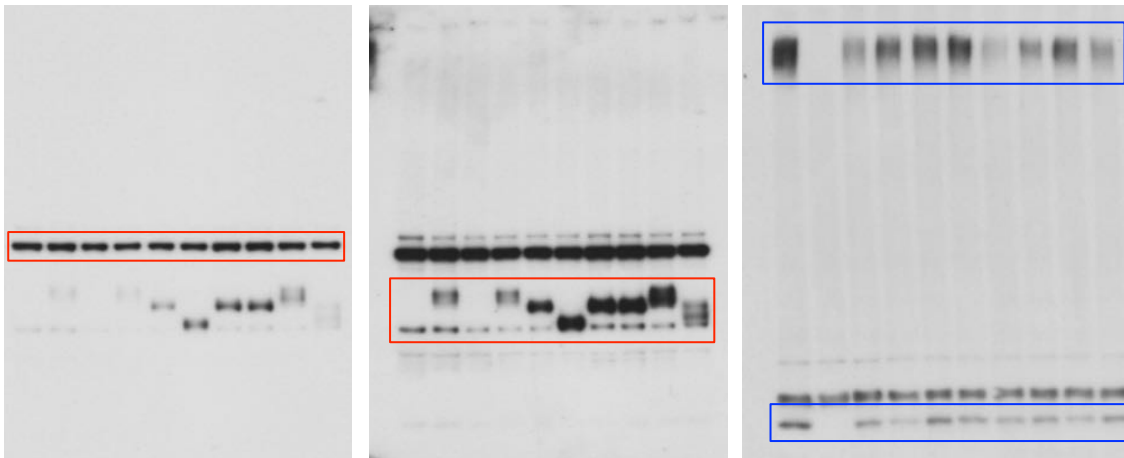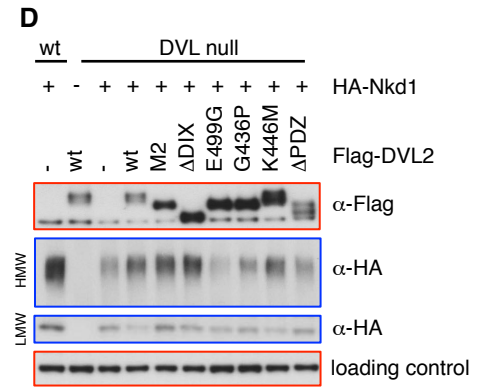

Figure 4 Gammons et al.

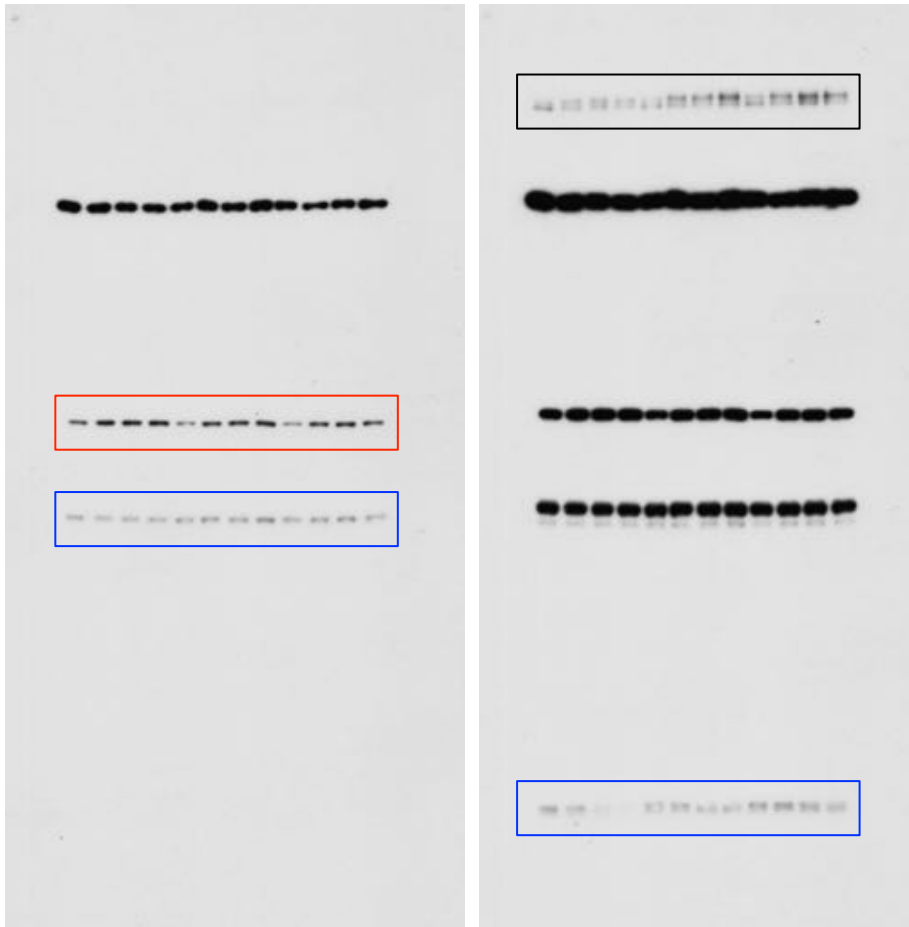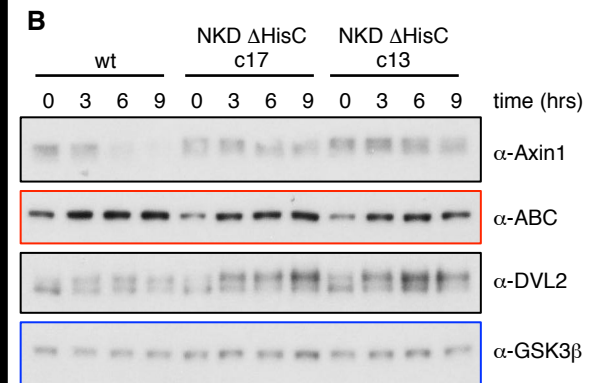

Figure 5 Gammons et al.

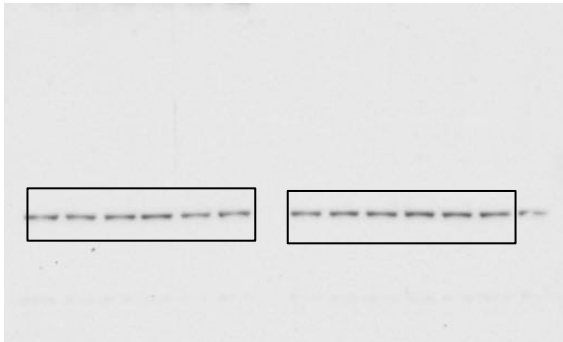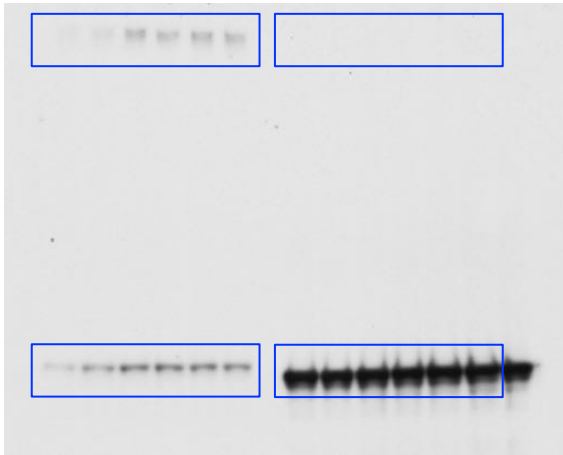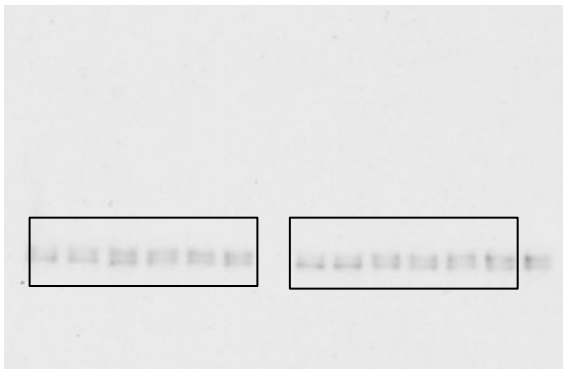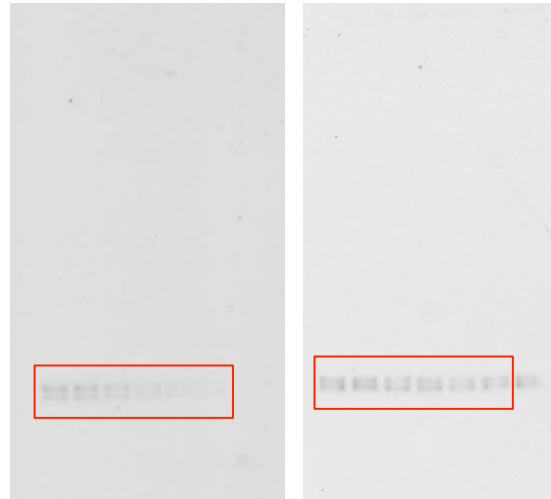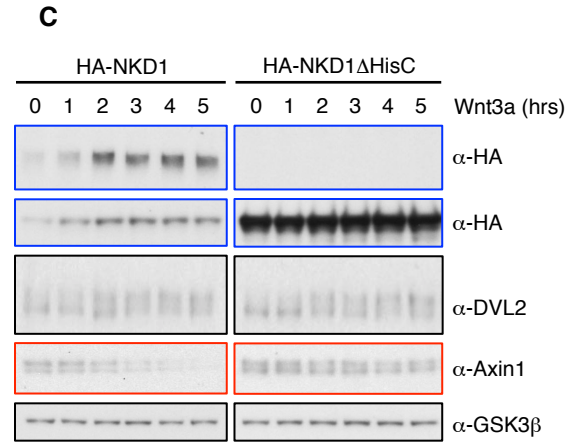

**Figure 5 Gammons et al.**



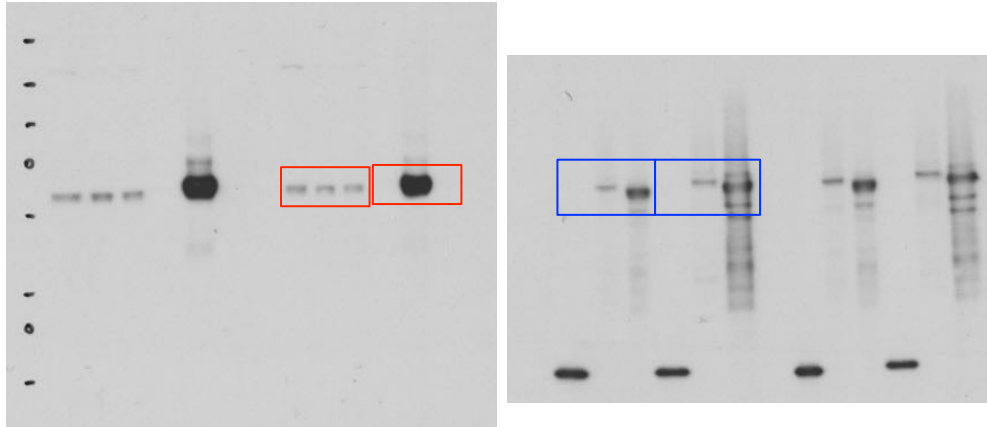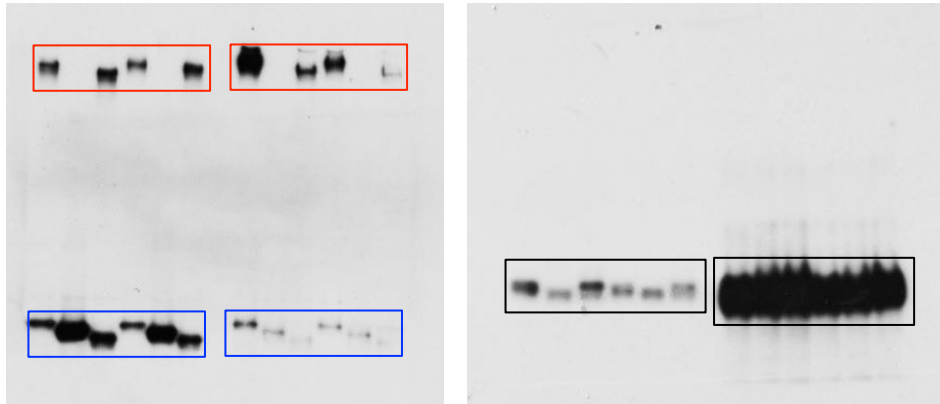

**C**

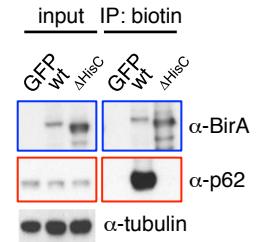

**D**

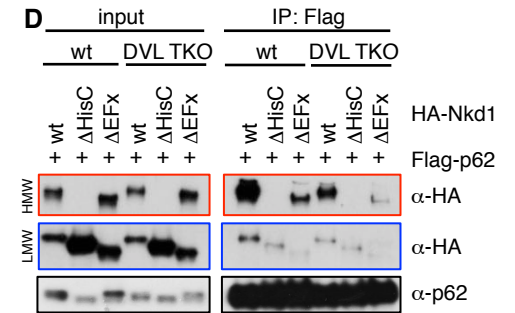

**Figure 8 Gammons et al.**

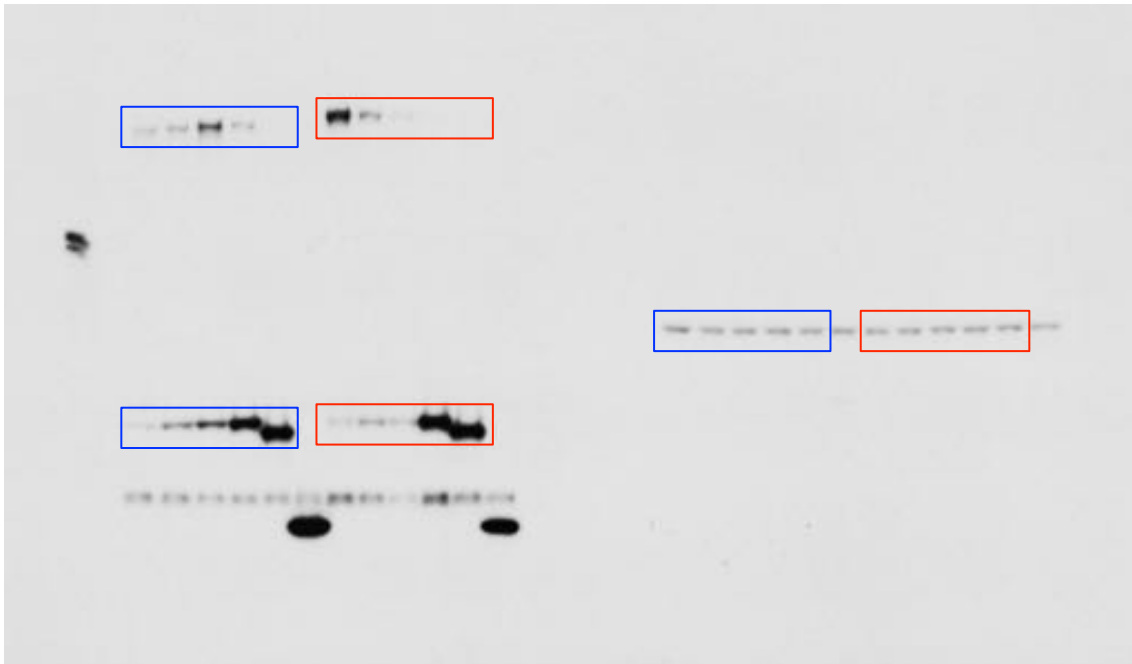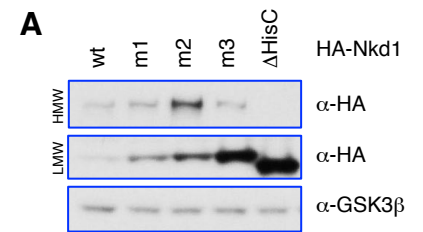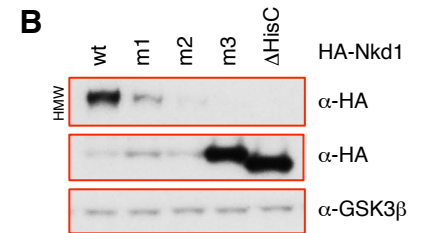

Figure S3 Gammons et al.

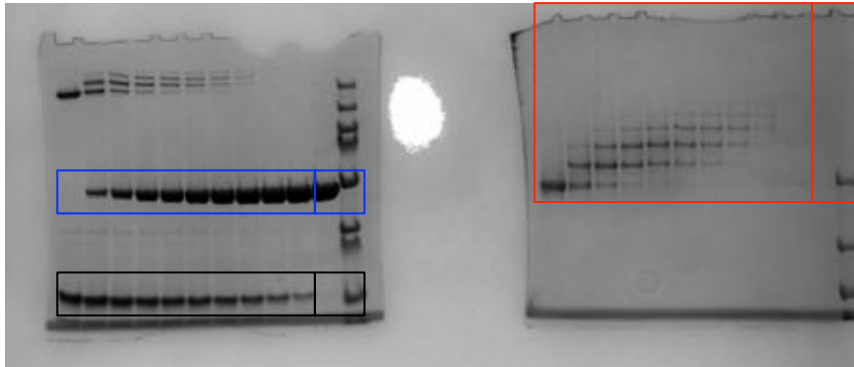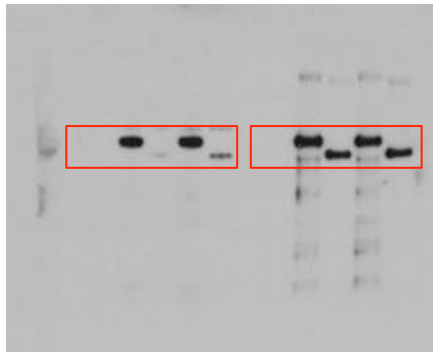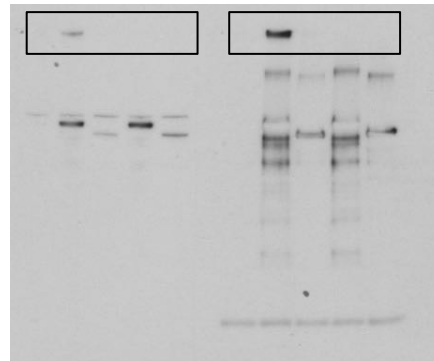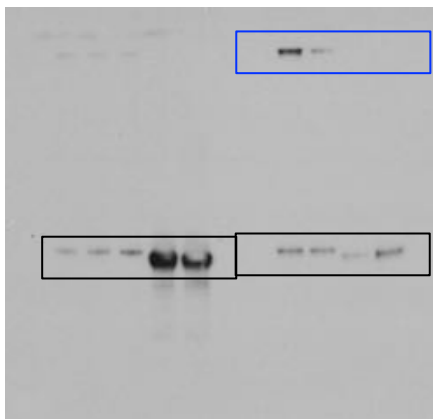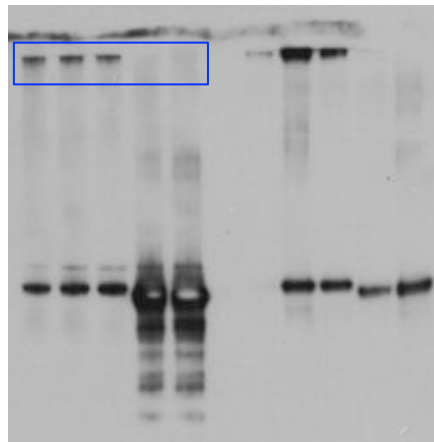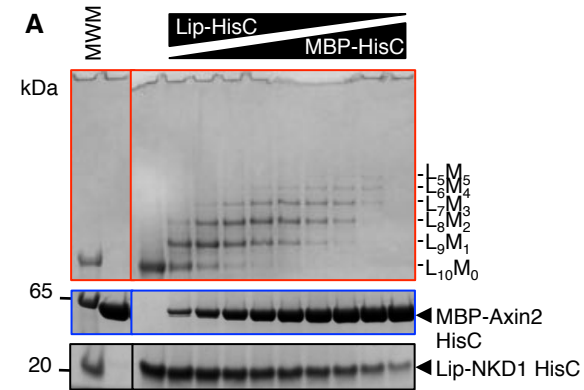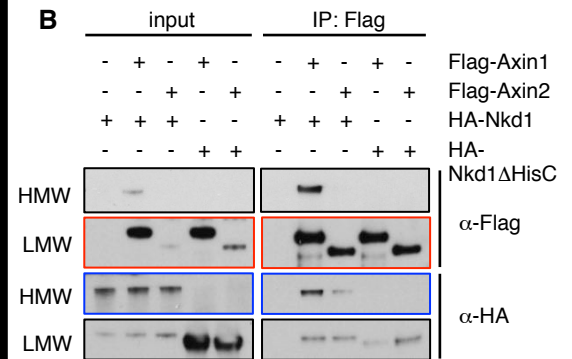

Figure S4 Gammons et al.

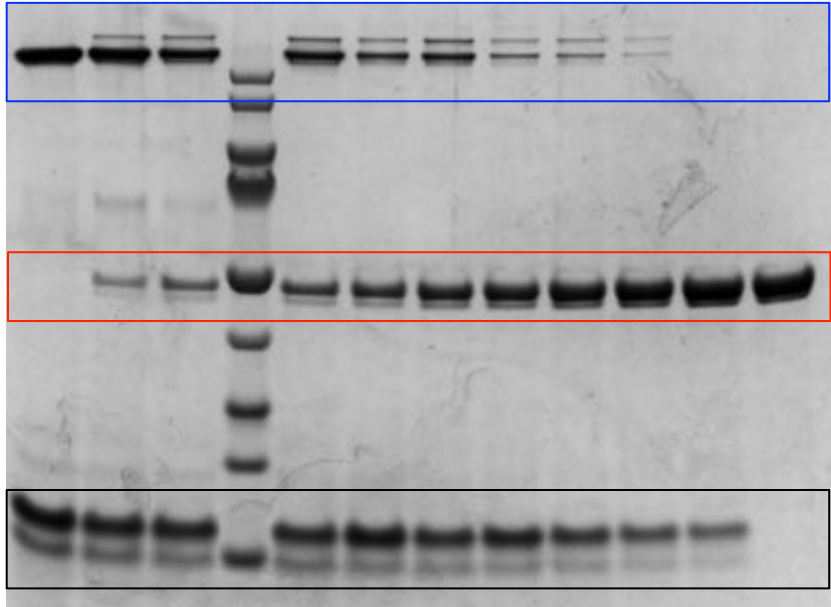

Example: all others gels cropped in the same way

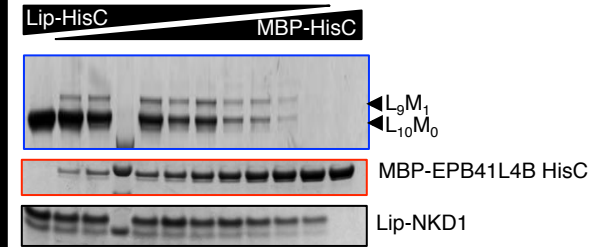

Figure S5 Gammons et al.

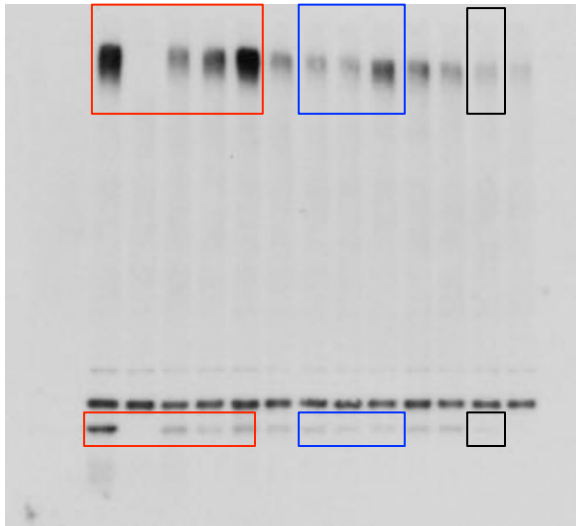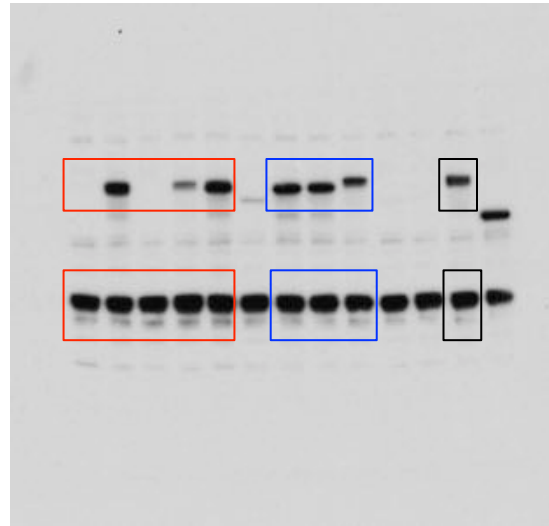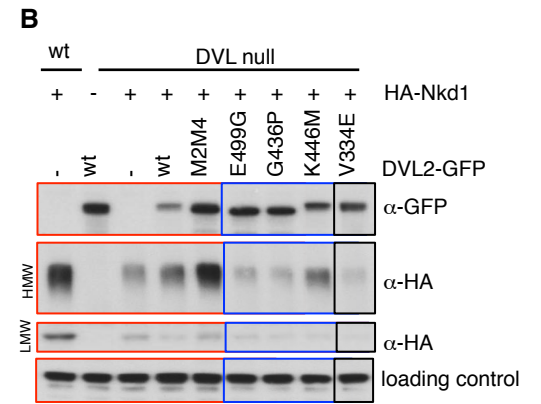

Figure S6 Gammons et al.

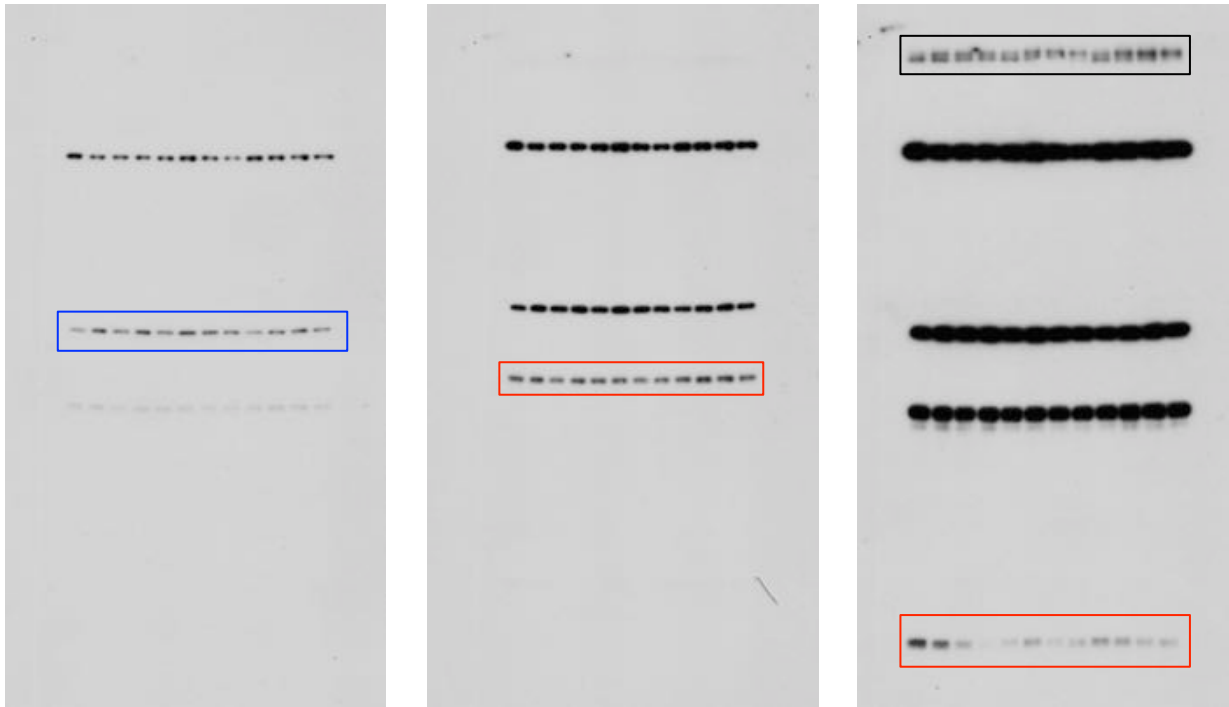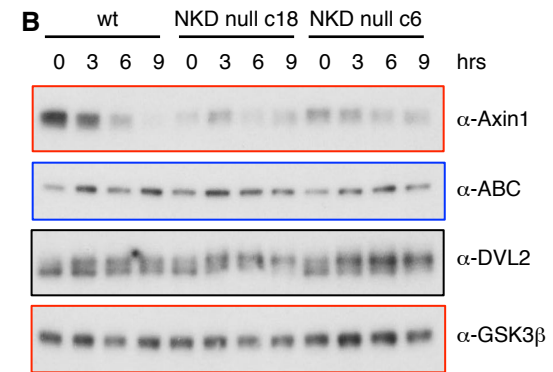

Figure S8 Gammons et al.
